# Supplementary material
Source: PubMed Central journal article supplement (PMC11406447)
Supplement: NIHMS2010919-supplement-Supplementary_Materials.pdf [file NIHMS2010919-supplement-Supplementary_Materials.pdf]

## Supplementary Material for Sbarra et al.

### Loneliness and Depression: Bidirectional Mendelian Randomization Analyses Using Data from Three Large Genome-Wide Association Studies

**Table S1.** F Statistics for Mendelian Randomization Analyses from Loneliness to MDD and MDD to Loneliness

| Exposure                                                  | Outcome                                                   | SNPs (n) | Mean F | Range F     |
|-----------------------------------------------------------|-----------------------------------------------------------|----------|--------|-------------|
| Loneliness                                                | Major Depression Disorder: Million Veterans Program       | 15       | 35.69  | 29.81-56.41 |
| Loneliness                                                | Major Depression Disorder: Psychiatric Genetic Consortium | 15       | 35.81  | 29.81-56.41 |
| Major Depression Disorder: Million Veterans Program       | Loneliness                                                | 19       | 30.52  | 25.33-45.80 |
| Major Depression Disorder: Psychiatric Genetic Consortium | Loneliness                                                | 11       | 28.86  | 25.75-37.37 |

**Table S2.** Cochran's heterogeneity statistic for Inverse Variance Weighted Mendelian Randomization analyses from Loneliness to MDD and MDD to Loneliness

| Exposure                                                  | Outcome                                                   | SNPs (n) | Q Statistic | p      |
|-----------------------------------------------------------|-----------------------------------------------------------|----------|-------------|--------|
| Loneliness                                                | Major Depression Disorder: Million Veterans Program       | 15       | 29.87       | 0.007  |
| Loneliness                                                | Major Depression Disorder: Psychiatric Genetic Consortium | 15       | 38.88       | <0.001 |
| Major Depression Disorder: Million Veterans Program       | Loneliness                                                | 19       | 44.58       | <0.001 |
| Major Depression Disorder: Psychiatric Genetic Consortium | Loneliness                                                | 11       | 32.83       | 0.001  |

**Table S3.**  $I^2_{GX}$  statistic from Loneliness to MDD and MDD to Loneliness

| Exposure                                                  | Outcome                                                   | SNPs (n) | $I^2_{GX}$ |
|-----------------------------------------------------------|-----------------------------------------------------------|----------|------------|
| Loneliness                                                | Major Depression Disorder: Million Veterans Program       | 15       | 0.318      |
| Loneliness                                                | Major Depression Disorder: Psychiatric Genetic Consortium | 15       | 0.348      |
| Major Depression Disorder: Million Veterans Program       | Loneliness                                                | 19       | 0.528      |
| Major Depression Disorder: Psychiatric Genetic Consortium | Loneliness                                                | 11       | 0.471      |

**Table S4.** Univariable Mendelian Randomization using Steiger filtering for Loneliness on MDD in the Psychiatric Genetic Consortium

| Exposure   | Outcome  | Method                    | SNPs (n) | $\beta$ | 95%CI        |
|------------|----------|---------------------------|----------|---------|--------------|
| Loneliness | MDD: PGC | Inverse Variance Weighted | 13       | 0.576   | 0.232, 0.920 |
|            |          | Weighted Median           | 13       | 0.704   | 0.294, 1.115 |
|            |          | Weighted Mode             | 13       | 0.910   | 0.168, 1.652 |
|            |          | RAPS                      | 13       | 0.599   | 0.315, 0.884 |
|            |          | MR-PRESSO                 | 13       | 0.576   | 0.490, 0.662 |

**Table S5.** Bidirectional Outlier-corrected SNPs in MR-PRESSO Analyses

| Exposure   | Outcome    | SNP       | Outlier Test, <i>p</i> |
|------------|------------|-----------|------------------------|
| Loneliness | MDD: MVP   | rs773020  | 0.045                  |
| MDD: MVP   | Loneliness | rs4779889 | <0.019                 |
| MDD: MVP   | Loneliness | rs9586    | 0.019                  |

**Table S6.** Bidirectional MR-PRESSO Global and Distortion Analyses in the Million Veterans Program

| Exposure   | Outcome    | Global Test, <i>p</i> | Distortion Test, <i>p</i> |
|------------|------------|-----------------------|---------------------------|
| Loneliness | MDD: MVP   | 0.017                 | 0.533                     |
| MDD: MVP   | Loneliness | 0.003                 | 0.924                     |

**Table S7.** Association of genome-wide significant SNPs used as instruments for Loneliness to MDD

| SNP                  | Chr | Pos       | EA | OA | N      | EAF   | BETA   | SE    | <i>r</i> <sup>2</sup> | <i>p</i> | N                                             | EAF   | BETA   | SE    | <i>r</i> <sup>2</sup> | <i>p</i> |
|----------------------|-----|-----------|----|----|--------|-------|--------|-------|-----------------------|----------|-----------------------------------------------|-------|--------|-------|-----------------------|----------|
| Exposure: Loneliness |     |           |    |    |        |       |        |       |                       |          | Outcome: MDD - Million Veterans Program       |       |        |       |                       |          |
| rs10456089           | 6   | 11959836  | G  | A  | 511000 | 0.933 | 0.036  | 0.006 | 6.26E-05              | <0.001   | 250215                                        | 0.924 | -0.009 | 0.018 | 3.70E-08              | 0.2537   |
| rs11039265           | 11  | 47523214  | C  | A  | 511000 | 0.648 | 0.018  | 0.003 | 5.85E-05              | <0.001   | 250215                                        | 0.642 | 0.005  | 0.01  | 1.99E-06              | 0.2069   |
| rs11068917           | 12  | 118791120 | C  | A  | 511000 | 0.812 | -0.022 | 0.004 | 6.26E-05              | <0.001   | 250215                                        | 0.826 | -0.016 | 0.012 | 6.46E-06              | 0.0014   |
| rs11867618           | 17  | 65875587  | G  | A  | 511000 | 0.853 | -0.024 | 0.004 | 8.81E-05              | <0.001   | 250215                                        | 0.86  | -0.013 | 0.013 | 3.03E-05              | 0.0237   |
| rs13291079           | 9   | 96360650  | T  | C  | 511000 | 0.573 | 0.02   | 0.003 | 5.83E-05              | <0.001   | 250215                                        | 0.572 | 0.011  | 0.009 | 9.67E-06              | 0.0036   |
| rs159960             | 1   | 8476428   | A  | G  | 511000 | 0.441 | 0.017  | 0.003 | 6.70E-05              | <0.001   | 250215                                        | 0.475 | 0.009  | 0.009 | 4.09E-06              | 0.019    |
| rs171697             | 5   | 103956516 | C  | G  | 511000 | 0.664 | -0.019 | 0.003 | 5.99E-05              | <0.001   | 250215                                        | 0.677 | -0.022 | 0.01  | 3.01E-05              | <0.001   |
| rs348258             | 20  | 47768988  | C  | T  | 511000 | 0.684 | -0.018 | 0.003 | 6.40E-05              | <0.001   | 250215                                        | 0.685 | -0.005 | 0.01  | 9.00E-06              | 0.2148   |
| rs4958586            | 5   | 152248567 | G  | A  | 511000 | 0.375 | -0.02  | 0.003 | 8.03E-05              | <0.001   | 250215                                        | 0.367 | -0.001 | 0.009 | 9.40E-09              | 0.8574   |
| rs599550             | 18  | 53252388  | G  | A  | 511000 | 0.171 | -0.03  | 0.004 | 0.00011               | <0.001   | 250215                                        | 0.145 | -0.01  | 0.013 | 1.74E-05              | 0.0567   |
| rs62347916           | 5   | 24239998  | G  | A  | 511000 | 0.511 | 0.017  | 0.003 | 6.05E-05              | <0.001   | 250215                                        | 0.511 | 0.003  | 0.009 | 1.05E-05              | 0.3718   |
| rs74338595           | 2   | 212749786 | T  | C  | 511000 | 0.701 | 0.02   | 0.003 | 7.00E-05              | <0.001   | 250215                                        | 0.702 | 0.009  | 0.01  | 2.92E-06              | 0.0483   |
| rs7626596            | 3   | 82000680  | G  | A  | 511000 | 0.434 | 0.018  | 0.003 | 6.87E-05              | <0.001   | 250215                                        | 0.442 | -0.002 | 0.009 | 2.55E-07              | 0.5946   |
| rs773020             | 9   | 77768122  | G  | A  | 511000 | 0.1   | -0.031 | 0.005 | 7.17E-05              | <0.001   | 250215                                        | 0.094 | 0.004  | 0.017 | 6.75E-06              | 0.5461   |
| rs7770860            | 6   | 131186393 | T  | C  | 511000 | 0.627 | -0.018 | 0.003 | 6.49E-05              | <0.001   | 250215                                        | 0.62  | -0.008 | 0.009 | 1.20E-05              | 0.0546   |
| Exposure: Loneliness |     |           |    |    |        |       |        |       |                       |          | Outcome: MDD - Psychiatric Genetic Consortium |       |        |       |                       |          |
| rs10456089           | 6   | 11959836  | G  | A  | 511000 | 0.933 | 0.036  | 0.006 | 6.26E-05              | <0.001   | 142646                                        | 0.924 | -0.021 | 0.018 | 9.13E-06              | 0.2537   |
| rs11039265           | 11  | 47523214  | C  | A  | 511000 | 0.648 | 0.018  | 0.003 | 5.85E-05              | <0.001   | 142646                                        | 0.642 | 0.012  | 0.01  | 1.28E-05              | 0.2069   |
| rs11068917           | 12  | 118791120 | C  | A  | 511000 | 0.812 | -0.022 | 0.004 | 6.26E-05              | <0.001   | 142646                                        | 0.826 | -0.037 | 0.012 | 7.11E-05              | 0.0014   |
| rs13291079           | 9   | 96360650  | T  | C  | 511000 | 0.573 | 0.02   | 0.003 | 6.54E-05              | <0.001   | 142646                                        | 0.86  | -0.029 | 0.013 | 3.59E-05              | 0.0237   |
| rs159960             | 1   | 8476428   | A  | G  | 511000 | 0.441 | 0.017  | 0.003 | 8.81E-05              | <0.001   | 142646                                        | 0.572 | 0.026  | 0.009 | 5.95E-05              | 0.0036   |
| rs171697             | 5   | 103956516 | C  | G  | 511000 | 0.664 | -0.019 | 0.003 | 5.83E-05              | <0.001   | 142646                                        | 0.475 | 0.021  | 0.009 | 3.86E-05              | 0.019    |
| rs2732650            | 17  | 44344988  | C  | G  | 511000 | 0.781 | -0.021 | 0.004 | 6.70E-05              | <0.001   | 142646                                        | 0.677 | -0.051 | 0.01  | 0.000198              | <0.001   |
| rs348258             | 20  | 47768988  | C  | T  | 511000 | 0.684 | -0.018 | 0.003 | 6.40E-05              | <0.001   | 142646                                        | 0.685 | -0.012 | 0.01  | 1.08E-05              | 0.2148   |
| rs4958586            | 5   | 152248567 | G  | A  | 511000 | 0.375 | -0.02  | 0.003 | 8.03E-05              | <0.001   | 142646                                        | 0.367 | -0.002 | 0.009 | 2.26E-07              | 0.8574   |

|            |    |           |   |   |        |       |        |       |          |        |        |       |        |       |          |        |
|------------|----|-----------|---|---|--------|-------|--------|-------|----------|--------|--------|-------|--------|-------|----------|--------|
| rs599550   | 18 | 53252388  | G | A | 511000 | 0.171 | -0.03  | 0.004 | 0.00011  | <0.001 | 142646 | 0.145 | -0.024 | 0.013 | 2.55E-05 | 0.0567 |
| rs62347916 | 5  | 24239998  | G | A | 511000 | 0.511 | 0.017  | 0.003 | 6.05E-05 | <0.001 | 142646 | 0.511 | 0.008  | 0.009 | 5.59E-06 | 0.3718 |
| rs74338595 | 2  | 212749786 | T | C | 511000 | 0.701 | 0.02   | 0.003 | 7.00E-05 | <0.001 | 142646 | 0.702 | 0.02   | 0.01  | 2.73E-05 | 0.0483 |
| rs7626596  | 3  | 82000680  | G | A | 511000 | 0.434 | 0.018  | 0.003 | 6.87E-05 | <0.001 | 142646 | 0.442 | -0.005 | 0.009 | 1.99E-06 | 0.5946 |
| rs773020   | 9  | 77768122  | G | A | 511000 | 0.1   | -0.031 | 0.005 | 7.17E-05 | <0.001 | 142646 | 0.094 | 0.01   | 0.017 | 2.55E-06 | 0.5461 |
| rs7770860  | 6  | 131186393 | T | C | 511000 | 0.627 | -0.018 | 0.003 | 6.49E-05 | <0.001 | 142646 | 0.62  | -0.018 | 0.009 | 2.59E-05 | 0.0546 |

**Table S8.** Association of genome-wide significant SNPs used as instruments for MDD to Loneliness

| SNP                                            | Chr | Pos       | EA | OA | N      | EA    | BETA   | SE    | r <sup>2</sup> | p      | N      | EA    | BETA   | SE    | r <sup>2</sup> | p      |
|------------------------------------------------|-----|-----------|----|----|--------|-------|--------|-------|----------------|--------|--------|-------|--------|-------|----------------|--------|
| Exposure: MDD - Million Veterans Program       |     |           |    |    |        |       |        |       |                |        |        |       |        |       |                |        |
| rs11156432                                     | 6   | 105440616 | A  | C  | 448956 | 0.242 | 0.042  | 0.008 | 5.74E-05       | <0.001 | 455364 | 0.197 | 0.001  | 0.001 | 2.17E-06       | 0.32   |
| rs11533158                                     | 9   | 140262426 | T  | C  | 448956 | 0.685 | -0.032 | 0.006 | 6.53E-05       | <0.001 | 455364 | 0.693 | -0.002 | 0.001 | 1.35E-05       | 0.013  |
| rs11770148                                     | 7   | 1899447   | A  | G  | 448956 | 0.814 | 0.048  | 0.008 | 9.31E-05       | <0.001 | 455364 | 0.826 | 0.002  | 0.001 | 5.94E-06       | 0.1    |
| rs11877758                                     | 18  | 35138110  | T  | G  | 448956 | 0.684 | -0.033 | 0.006 | 6.07E-05       | <0.001 | 455364 | 0.688 | -0.002 | 0.001 | 6.96E-06       | 0.075  |
| rs147763467                                    | 17  | 47700587  | T  | C  | 448956 | 0.017 | -0.123 | 0.024 | 5.83E-05       | <0.001 | 455364 | 0.02  | -0.001 | 0.003 | 3.04E-07       | 0.71   |
| rs1553172                                      | 1   | 197818233 | A  | G  | 448956 | 0.49  | 0.033  | 0.006 | 6.93E-05       | <0.001 | 455364 | 0.49  | 0.002  | 0.001 | 1.75E-05       | 0.0048 |
| rs28712194                                     | 8   | 1778193   | T  | C  | 448956 | 0.238 | 0.036  | 0.006 | 6.68E-05       | <0.001 | 455364 | 0.243 | 0.001  | 0.001 | 3.45E-10       | 0.99   |
| rs4776729                                      | 15  | 66399197  | A  | G  | 448956 | 0.866 | -0.045 | 0.009 | 6.00E-05       | <0.001 | 455364 | 0.858 | -0.001 | 0.001 | 3.61E-06       | 0.2    |
| rs4779889                                      | 15  | 31814203  | T  | G  | 448956 | 0.215 | -0.035 | 0.007 | 5.74E-05       | <0.001 | 455364 | 0.22  | 0.002  | 0.001 | 1.06E-05       | 0.028  |
| rs4972656                                      | 2   | 175240292 | T  | C  | 448956 | 0.564 | 0.038  | 0.006 | 0.000102       | <0.001 | 455364 | 0.566 | 0.002  | 0.001 | 1.42E-05       | 0.011  |
| rs6030257                                      | 20  | 41087450  | A  | C  | 448956 | 0.632 | 0.03   | 0.006 | 5.73E-05       | <0.001 | 455364 | 0.629 | -0.001 | 0.001 | 2.00E-06       | 0.34   |
| rs612823                                       | 11  | 133834104 | T  | C  | 448956 | 0.609 | 0.033  | 0.006 | 6.86E-05       | <0.001 | 455364 | 0.62  | 0.001  | 0.001 | 5.61E-06       | 0.11   |
| rs61902811                                     | 11  | 113370758 | A  | G  | 448956 | 0.359 | -0.035 | 0.006 | 8.09E-05       | <0.001 | 455364 | 0.368 | -0.003 | 0.001 | 2.59E-05       | <0.001 |
| rs7523829                                      | 1   | 73758117  | A  | G  | 448956 | 0.489 | 0.029  | 0.006 | 5.84E-05       | <0.001 | 455364 | 0.467 | 0.001  | 0.001 | 3.16E-06       | 0.23   |
| rs75452111                                     | 2   | 184480902 | A  | G  | 448956 | 0.384 | 0.032  | 0.006 | 6.23E-05       | <0.001 | 455364 | 0.395 | 0.001  | 0.001 | 2.36E-06       | 0.3    |
| rs7574611                                      | 2   | 51214993  | A  | C  | 448956 | 0.413 | -0.031 | 0.006 | 6.26E-05       | <0.001 | 455364 | 0.431 | -0.002 | 0.001 | 1.65E-05       | 0.0061 |
| rs7629352                                      | 3   | 16848835  | A  | G  | 448956 | 0.691 | -0.034 | 0.006 | 6.99E-05       | <0.001 | 455364 | 0.701 | -0.003 | 0.001 | 1.99E-05       | 0.0026 |
| rs76966748                                     | 2   | 148569240 | A  | G  | 448956 | 0.047 | 0.102  | 0.016 | 8.46E-05       | <0.001 | 455364 | 0.065 | 0.001  | 0.002 | 1.31E-06       | 0.44   |
| rs9586                                         | 3   | 49213637  | T  | C  | 448956 | 0.769 | -0.034 | 0.007 | 5.91E-05       | <0.001 | 455364 | 0.778 | -0.004 | 0.001 | 4.06E-05       | <0.001 |
| Exposure: MDD - Psychiatric Genetic Consortium |     |           |    |    |        |       |        |       |                |        |        |       |        |       |                |        |
| rs17499892                                     | 7   | 136692467 | A  | C  | 142646 | 0.624 | -0.05  | 0.009 | 0.000204       | <0.001 | 455364 | 0.61  | -0.002 | 0.001 | 9.17E-06       | 0.041  |
| rs1936365                                      | 6   | 28268452  | C  | G  | 142646 | 0.144 | -0.069 | 0.013 | 0.000203       | <0.001 | 455364 | 0.163 | -0.002 | 0.001 | 9.36E-06       | 0.039  |
| rs1950829                                      | 14  | 42097937  | A  | G  | 142646 | 0.487 | 0.054  | 0.009 | 0.000264       | <0.001 | 455364 | 0.481 | 0.001  | 0.001 | 8.25E-07       | 0.54   |
| rs2012697                                      | 1   | 72819612  | T  | C  | 142646 | 0.398 | -0.048 | 0.009 | 0.000197       | <0.001 | 455364 | 0.401 | -0.001 | 0.001 | 4.78E-06       | 0.14   |
| rs2060886                                      | 18  | 53167520  | T  | C  | 142646 | 0.426 | -0.046 | 0.009 | 0.000181       | <0.001 | 455364 | 0.422 | -0.003 | 0.001 | 3.49E-05       | <0.001 |
| rs2451828                                      | 5   | 7448796   | T  | C  | 142646 | 0.024 | 0.159  | 0.031 | 0.000189       | <0.001 | 455364 | 0.023 | 0.001  | 0.003 | 2.05E-07       | 0.76   |
| rs34382743                                     | 2   | 145741849 | T  | C  | 142646 | 0.596 | 0.046  | 0.009 | 0.000183       | <0.001 | 455364 | 0.598 | 0.001  | 0.001 | 7.16E-06       | 0.071  |
| rs4811079                                      | 20  | 49157052  | C  | G  | 142646 | 0.625 | 0.049  | 0.009 | 2.00E-04       | <0.001 | 455364 | 0.638 | -0.001 | 0.001 | 5.31E-06       | 0.12   |
| rs6689226                                      | 1   | 73806923  | T  | C  | 142646 | 0.407 | 0.05   | 0.009 | 0.000201       | <0.001 | 455364 | 0.369 | 0.001  | 0.001 | 3.16E-06       | 0.23   |
| rs6832890                                      | 4   | 42106538  | C  | G  | 142646 | 0.206 | -0.06  | 0.011 | 0.000198       | <0.001 | 455364 | 0.197 | -0.002 | 0.001 | 1.12E-05       | 0.024  |
| rs78676209                                     | 5   | 44212359  | C  | G  | 142646 | 0.948 | -0.104 | 0.02  | 0.000183       | <0.001 | 455364 | 0.954 | 0.001  | 0.002 | 2.23E-07       | 0.75   |

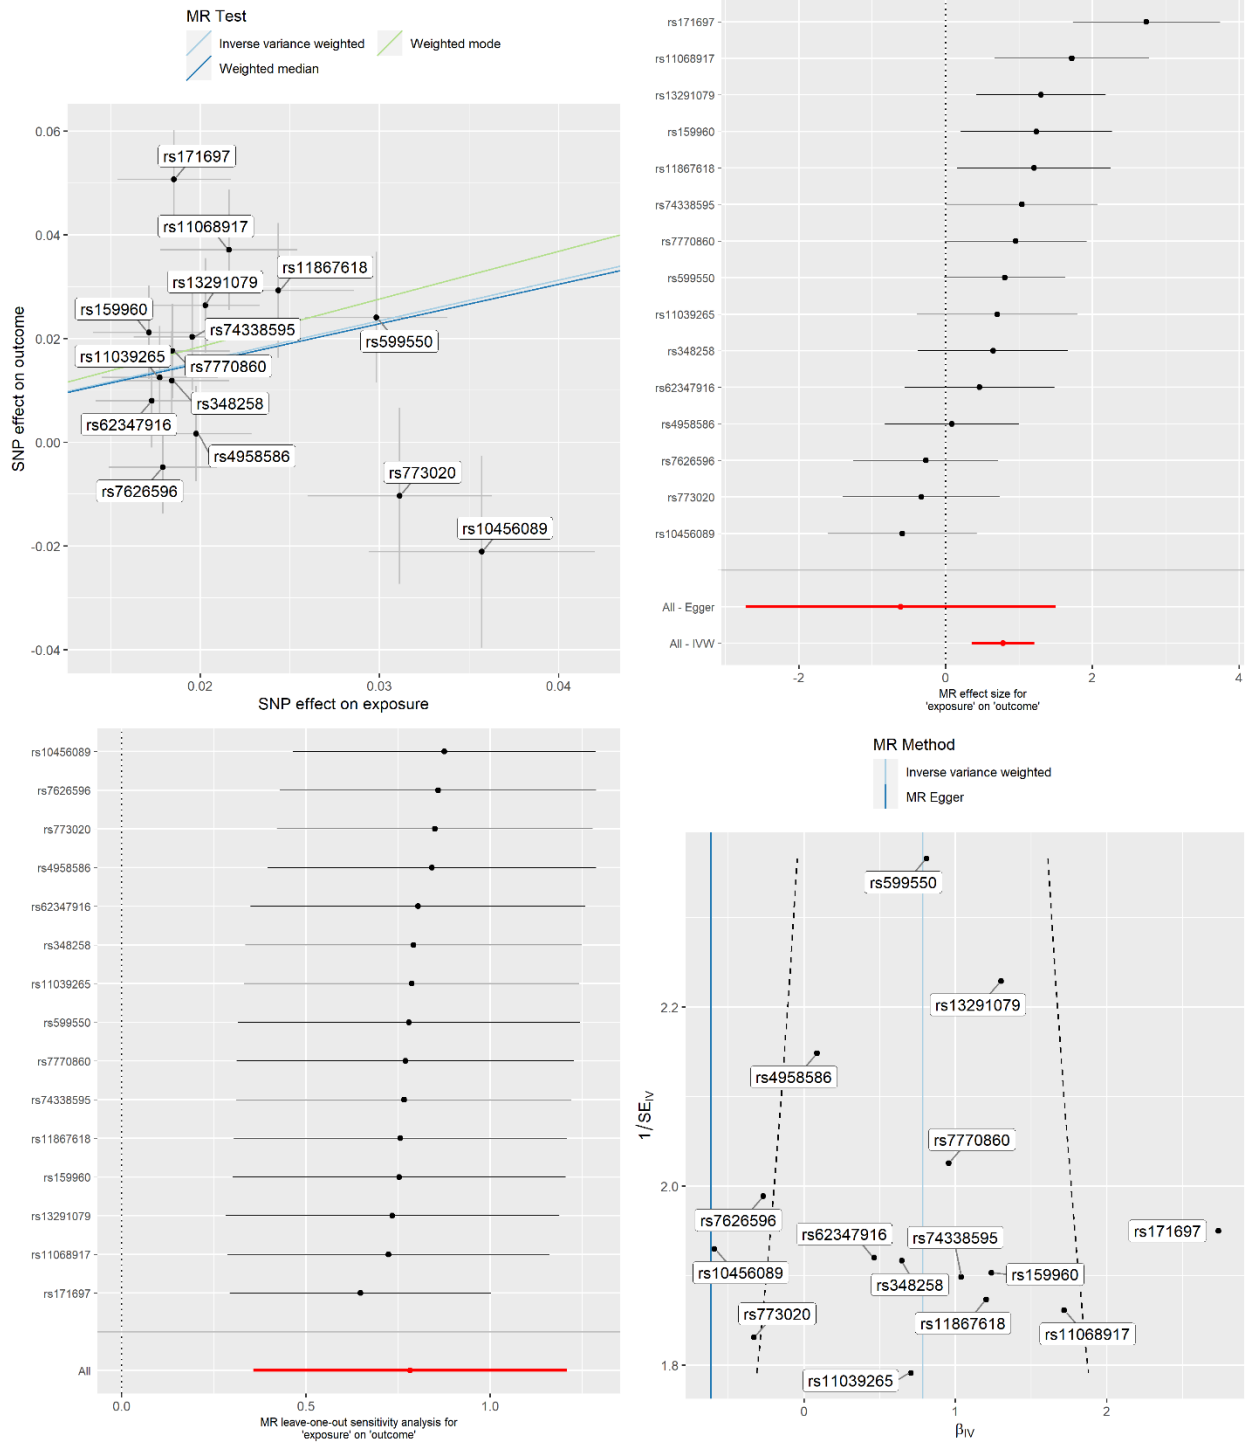

**Figure S1.** Sensitivity analyses of Loneliness Exposure on Major Depressive Disorder in the Psychiatric Genetic Consortium including Method Comparison (top left), Forest plot (top right), Leave-one-out (bottom left) and Funnel Plot (bottom right)

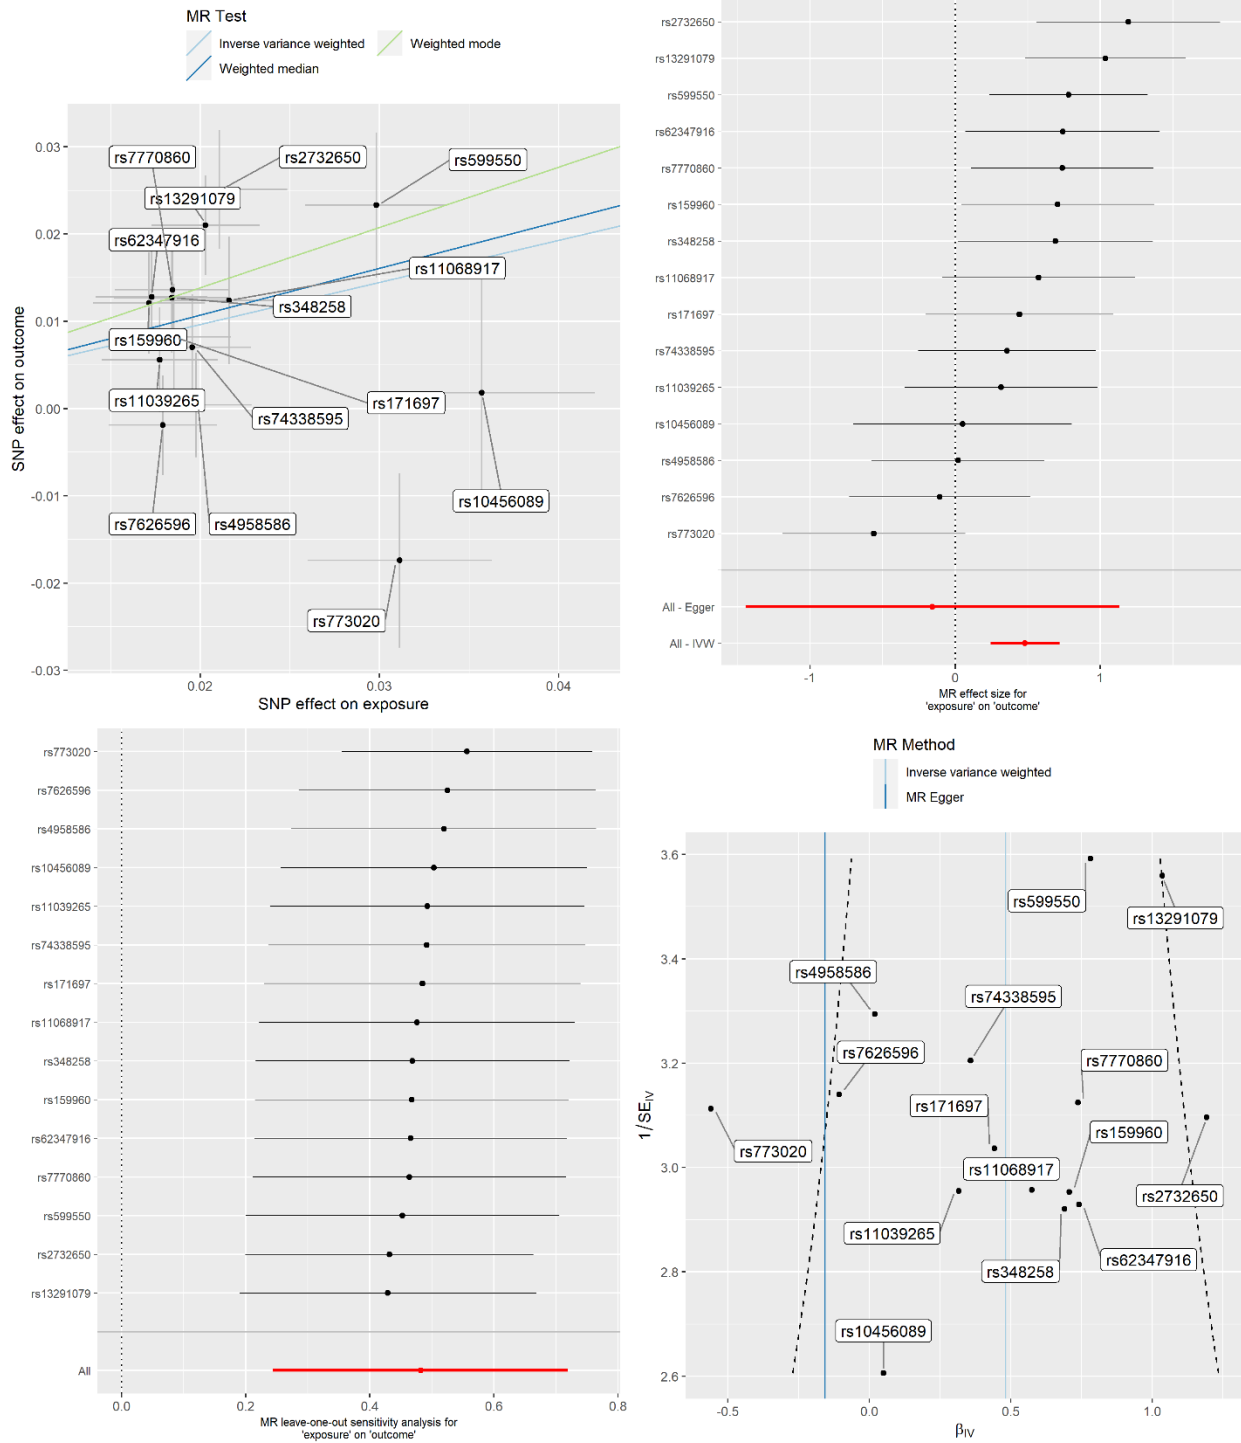

**Figure S2.** Sensitivity analyses of Loneliness Exposure on Major Depressive Disorder in the Million Veterans Program including Method Comparison (top left), Forest plot (top right), Leave-one-out (bottom left) and Funnel Plot (bottom right)

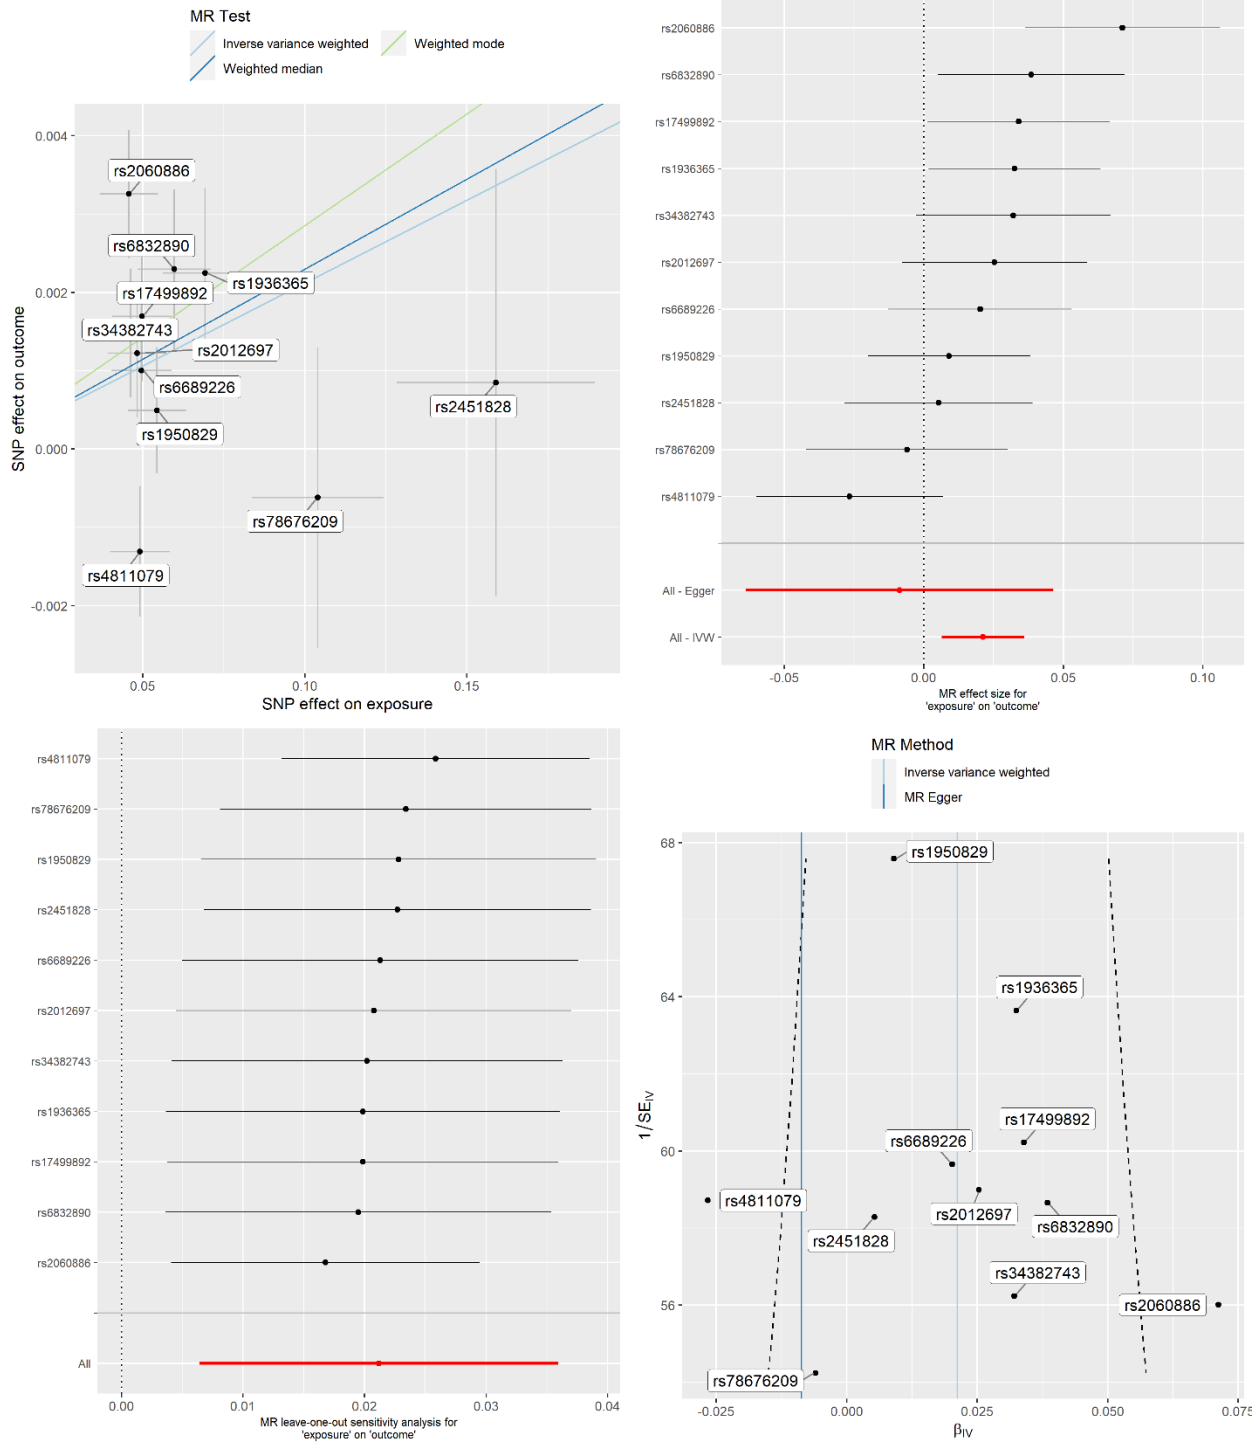

**Figure S3.** Sensitivity analyses of Major Depressive Disorder in the Psychiatric Genetic Consortium on Loneliness including Method Comparison (top left), Forest plot (top right), Leave-one-out (bottom left) and Funnel Plot (bottom right)

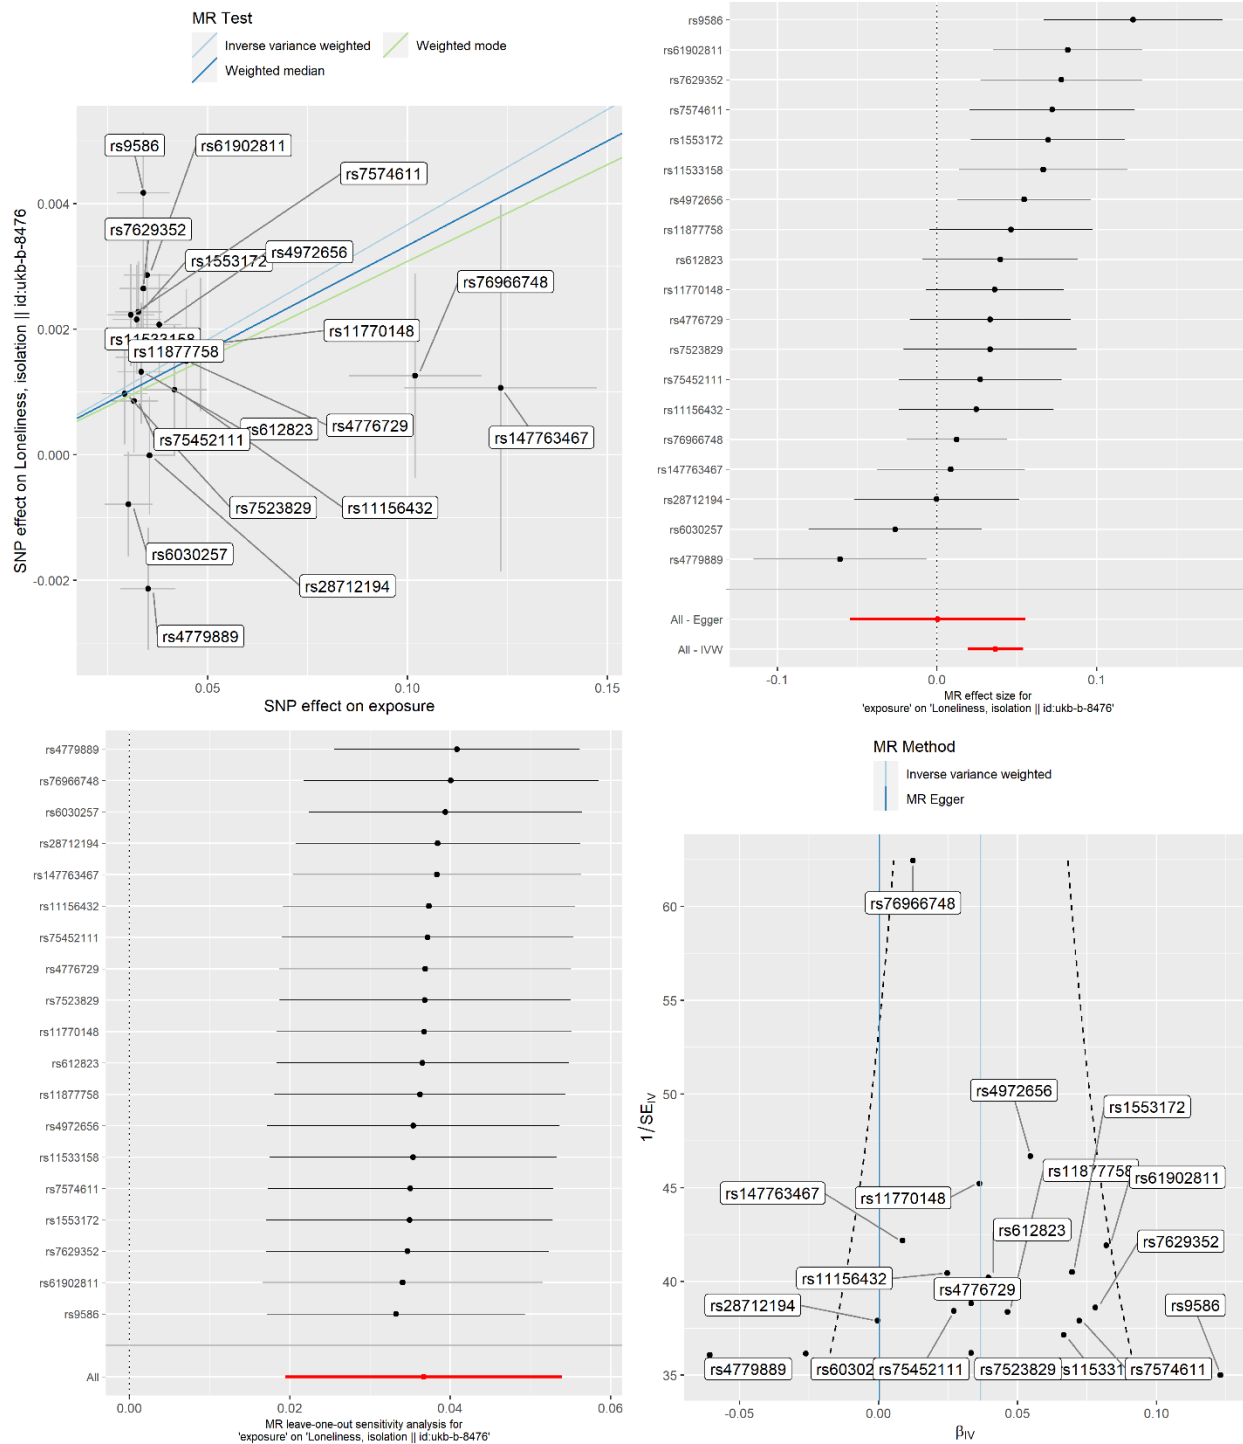

**Figure S4.** Sensitivity analyses of Major Depressive Disorder in the Million Veterans Program on Loneliness including Method Comparison (top left), Forest plot (top right), Leave-one-out (bottom left) and Funnel Plot (bottom right)

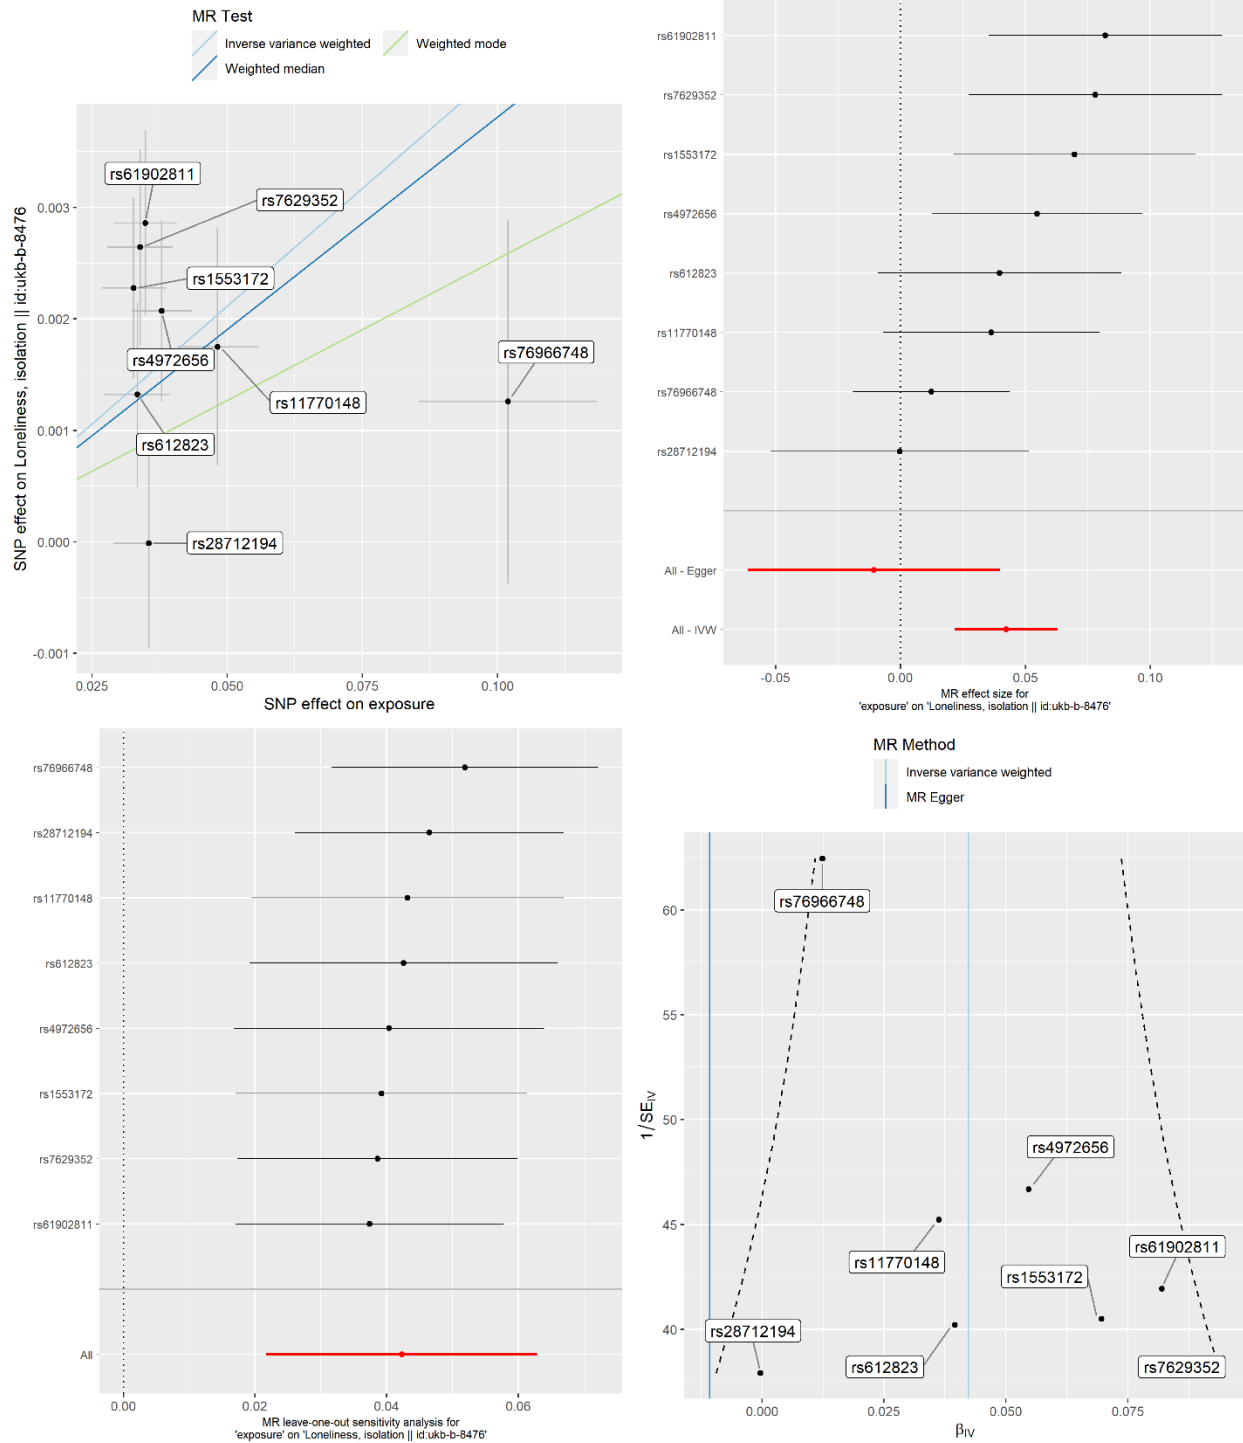

**Figure S5.** Sensitivity Analysis using  $10^{-8}$  Significant Threshold for MDD in the Million Veterans Program and Loneliness including Method Comparison (top left), Forest plot (top right), Leave-one-out (bottom left) and Funnel Plot (bottom right)



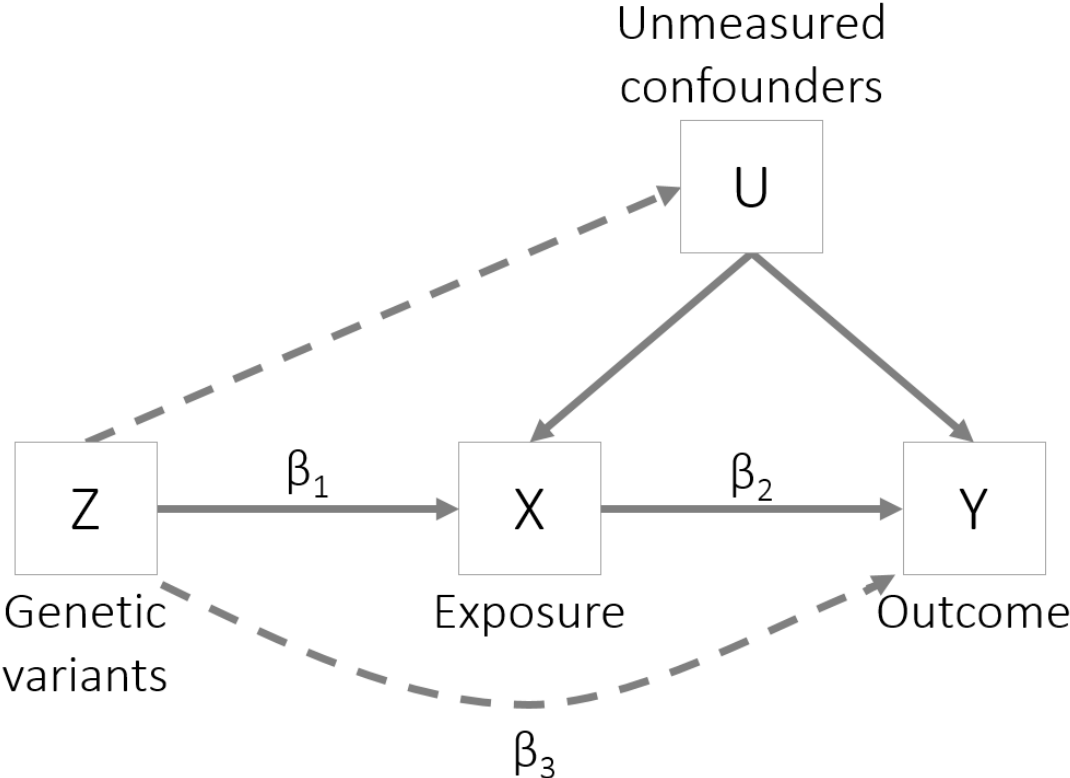

Figure S6. Mendelian Randomization Model

**Table S9.** Univariable Mendelian Randomization Sensitivity Analyses for Loneliness and Major Depressive Disorder using Loneliness phenotype from Elsworth et al.

| Exposure   | Outcome  | Method                    | SNPs (n) | $\beta$ | 95%CI        |
|------------|----------|---------------------------|----------|---------|--------------|
| Loneliness | MDD: MVP | Inverse Variance Weighted | 16       | 1.790   | 0.905, 2.675 |
|            |          | Weighted Median           | 16       | 1.732   | 0.856, 2.608 |
|            |          | Weighted Mode             | 16       | 2.108   | 0.36, 3.855  |
|            |          | RAPS                      | 16       | 1.890   | 1.271, 2.509 |
|            |          | MR-PRESSO                 | 16       | 1.779   | 0.599, 2.96  |
| Loneliness | MDD: PGC | Inverse Variance Weighted | 16       | 2.777   | 1.253, 4.302 |
|            |          | Weighted Median           | 16       | 2.744   | 1.279, 4.209 |
|            |          | Weighted Mode             | 16       | 4.105   | 1.38, 6.83   |
|            |          | RAPS                      | 16       | 2.966   | 2.002, 3.93  |
|            |          | MR-PRESSO                 | 16       | 2.310   | 1.99, 2.631  |

**Table S10.** F Statistics for Mendelian Randomization Sensitivity Analyses from Loneliness to MDD and MDD to Loneliness using Loneliness phenotype from Elsworth et al.

| Exposure   | Outcome  | SNPs (n) | Mean F | Range F     |
|------------|----------|----------|--------|-------------|
| Loneliness | MDD: MVP | 16       | 35.9   | 30.14-57.45 |
| Loneliness | MDD: PGC | 16       | 35.9   | 30.14-57.45 |

**Table S11.** Cochran's heterogeneity statistic for Inverse Variance Weighted Mendelian Randomization Sensitivity analyses from Loneliness to MDD and MDD to Loneliness using Loneliness phenotype from Elsworth et al.

| Exposure   | Outcome  | SNPs (n) | Q Statistic | $p$    |
|------------|----------|----------|-------------|--------|
| Loneliness | MDD: MVP | 16       | 33.67       | 0.004  |
| Loneliness | MDD: PGC | 16       | 40.78       | <0.001 |

**Table S12.**  $I^2_{GX}$  statistics for Sensitivity Analyses from Loneliness to MDD and MDD to Loneliness using Loneliness phenotype from Elsworth et al.

| Exposure   | Outcome  | SNPs (n) | $I^2_{GX}$ |
|------------|----------|----------|------------|
| Loneliness | MDD: MVP | 16       | 0.405      |
| Loneliness | MDD: PGC | 16       | 0.405      |

**Table S13.** Outlier-corrected SNPs in MR-PRESSO Sensitivity Analyses in the Million Veterans Program using Loneliness phenotype from Elsworth et al.

| Exposure   | Outcome  | SNP        | Outlier Test, $p$ |
|------------|----------|------------|-------------------|
| Loneliness | MDD: MVP | rs62085660 | 0.032             |
| Loneliness | MDD: MVP | rs773020   | 0.048             |
| Loneliness | MDD: PGC | rs30266    | 0.032             |

**Table S14.** MR-PRESSO Global and Distortion Sensitivity Analyses in the Million Veterans Program using Loneliness phenotype from Elsworth et al.

| Exposure                    | Outcome  | Global Test, <i>p</i> | Distortion Test, <i>p</i> |
|-----------------------------|----------|-----------------------|---------------------------|
| Loneliness: Elsworth et al. | MDD: MVP | 0.006                 | 0.978                     |
| Loneliness: Elsworth et al. | MDD: PGC | 0.002                 | 0.331                     |

**Table S15.** Association of genome-wide significant SNPs from Sensitivity Analyses for Loneliness to MDD using Loneliness phenotype from Elsworth et al.

| SNP                                                                | Chr | Pos       | EA | OA | N      | EAF   | BETA   | SE    | r <sup>2</sup> | p      | N      | EAF   | BETA   | SE    | r <sup>2</sup> | p      |
|--------------------------------------------------------------------|-----|-----------|----|----|--------|-------|--------|-------|----------------|--------|--------|-------|--------|-------|----------------|--------|
| Exposure: Loneliness Outcome: MDD - Million Veterans Program       |     |           |    |    |        |       |        |       |                |        |        |       |        |       |                |        |
| rs1022688                                                          | 20  | 47648856  | A  | G  | 455364 | 0.33  | 0.005  | 0.001 | 7.04E-05       | <0.001 | 448956 | 0.343 | 0.011  | 0.006 | 6.35E-06       | 0.0914 |
| rs10456089                                                         | 6   | 11959836  | A  | G  | 455364 | 0.079 | -0.01  | 0.002 | 8.86E-05       | <0.001 | 448956 | 0.069 | -0.002 | 0.014 | 3.70E-08       | 0.8975 |
| rs10950394                                                         | 7   | 12263587  | T  | C  | 455364 | 0.419 | 0.005  | 0.001 | 6.88E-05       | <0.001 | 448956 | 0.424 | 0.012  | 0.006 | 9.72E-06       | 0.0367 |
| rs13291079                                                         | 9   | 96360650  | C  | T  | 455364 | 0.423 | -0.005 | 0.001 | 9.83E-05       | <0.001 | 448956 | 0.419 | -0.021 | 0.006 | 3.03E-05       | <0.001 |
| rs159960                                                           | 1   | 8476428   | G  | A  | 455364 | 0.556 | -0.004 | 0.001 | 6.62E-05       | <0.001 | 448956 | 0.533 | -0.012 | 0.006 | 9.67E-06       | 0.0372 |
| rs2149351                                                          | 9   | 120501644 | G  | T  | 455364 | 0.757 | -0.005 | 0.001 | 6.79E-05       | <0.001 | 448956 | 0.763 | -0.001 | 0.007 | 8.01E-08       | 0.8496 |
| rs30266                                                            | 5   | 103972357 | A  | G  | 455364 | 0.328 | 0.005  | 0.001 | 7.38E-05       | <0.001 | 448956 | 0.319 | 0.008  | 0.006 | 4.31E-06       | 0.1644 |
| rs599550                                                           | 18  | 53252388  | A  | G  | 455364 | 0.848 | 0.009  | 0.001 | 0.000126       | <0.001 | 448956 | 0.864 | 0.023  | 0.008 | 1.74E-05       | 0.0051 |
| rs62085660                                                         | 17  | 66097739  | G  | C  | 455364 | 0.742 | -0.005 | 0.001 | 7.44E-05       | <0.001 | 448956 | 0.716 | -0.03  | 0.007 | 4.63E-05       | <0.001 |
| rs6430286                                                          | 2   | 148834364 | A  | G  | 455364 | 0.425 | -0.005 | 0.001 | 7.10E-05       | <0.001 | 448956 | 0.433 | -0.007 | 0.006 | 3.18E-06       | 0.2319 |
| rs67988891                                                         | 5   | 152204741 | G  | C  | 455364 | 0.319 | -0.006 | 0.001 | 9.14E-05       | <0.001 | 448956 | 0.313 | -0.002 | 0.006 | 3.18E-07       | 0.7055 |
| rs7107356                                                          | 11  | 47676170  | G  | A  | 455364 | 0.507 | 0.004  | 0.001 | 6.70E-05       | <0.001 | 448956 | 0.504 | 0.008  | 0.006 | 4.42E-06       | 0.1589 |
| rs74338595                                                         | 2   | 212749786 | C  | T  | 455364 | 0.291 | -0.005 | 0.001 | 7.54E-05       | <0.001 | 448956 | 0.294 | -0.007 | 0.006 | 2.92E-06       | 0.252  |
| rs7626596                                                          | 3   | 82000680  | A  | G  | 455364 | 0.567 | -0.005 | 0.001 | 7.49E-05       | <0.001 | 448956 | 0.554 | 0.002  | 0.006 | 2.55E-07       | 0.7351 |
| rs773020                                                           | 9   | 77768122  | A  | G  | 455364 | 0.9   | 0.008  | 0.001 | 7.26E-05       | <0.001 | 448956 | 0.901 | -0.017 | 0.01  | 6.75E-06       | 0.0817 |
| rs7770860                                                          | 6   | 131186393 | C  | T  | 455364 | 0.373 | 0.005  | 0.001 | 7.33E-05       | <0.001 | 448956 | 0.37  | 0.014  | 0.006 | 1.20E-05       | 0.0203 |
| Exposure: Loneliness Outcome: MDD - Psychiatric Genetic Consortium |     |           |    |    |        |       |        |       |                |        |        |       |        |       |                |        |
| rs1022688                                                          | 20  | 47648856  | A  | G  | 455364 | 0.33  | 0.005  | 0.001 | 7.04E-05       | <0.001 | 142646 | 0.334 | 0.011  | 0.009 | 8.87E-06       | 0.2606 |
| rs10456089                                                         | 6   | 11959836  | A  | G  | 455364 | 0.079 | -0.01  | 0.002 | 8.86E-05       | <0.001 | 142646 | 0.076 | 0.021  | 0.018 | 9.13E-06       | 0.2537 |
| rs10950394                                                         | 7   | 12263587  | T  | C  | 455364 | 0.419 | 0.005  | 0.001 | 6.88E-05       | <0.001 | 142646 | 0.415 | 0.022  | 0.009 | 4.30E-05       | 0.0133 |
| rs13291079                                                         | 9   | 96360650  | C  | T  | 455364 | 0.423 | -0.005 | 0.001 | 9.83E-05       | <0.001 | 142646 | 0.428 | -0.026 | 0.009 | 5.95E-05       | 0.0036 |
| rs159960                                                           | 1   | 8476428   | G  | A  | 455364 | 0.556 | -0.004 | 0.001 | 6.62E-05       | <0.001 | 142646 | 0.525 | -0.021 | 0.009 | 3.86E-05       | 0.019  |
| rs2149351                                                          | 9   | 120501644 | G  | T  | 455364 | 0.757 | -0.005 | 0.001 | 6.79E-05       | <0.001 | 142646 | 0.764 | -0.027 | 0.01  | 4.69E-05       | 0.0097 |
| rs30266                                                            | 5   | 103972357 | A  | G  | 455364 | 0.328 | 0.005  | 0.001 | 7.38E-05       | <0.001 | 142646 | 0.323 | 0.05   | 0.01  | 0.000195       | <0.001 |
| rs599550                                                           | 18  | 53252388  | A  | G  | 455364 | 0.848 | 0.009  | 0.001 | 0.000126       | <0.001 | 142646 | 0.855 | 0.024  | 0.013 | 2.55E-05       | 0.0567 |
| rs62085660                                                         | 17  | 66097739  | G  | C  | 455364 | 0.742 | -0.005 | 0.001 | 7.44E-05       | <0.001 | 135581 | 0.733 | -0.01  | 0.011 | 6.21E-06       | 0.3589 |
| rs6430286                                                          | 2   | 148834364 | A  | G  | 455364 | 0.425 | -0.005 | 0.001 | 7.10E-05       | <0.001 | 142646 | 0.425 | -0.001 | 0.009 | 1.24E-07       | 0.894  |
| rs67988891                                                         | 5   | 152204741 | G  | C  | 455364 | 0.319 | -0.006 | 0.001 | 9.14E-05       | <0.001 | 135581 | 0.322 | 0.002  | 0.01  | 3.01E-07       | 0.8399 |
| rs7107356                                                          | 11  | 47676170  | G  | A  | 455364 | 0.507 | 0.004  | 0.001 | 6.70E-05       | <0.001 | 142646 | 0.497 | 0.021  | 0.009 | 4.03E-05       | 0.0165 |
| rs74338595                                                         | 2   | 212749786 | C  | T  | 455364 | 0.291 | -0.005 | 0.001 | 7.54E-05       | <0.001 | 142646 | 0.298 | -0.02  | 0.01  | 2.73E-05       | 0.0483 |
| rs7626596                                                          | 3   | 82000680  | A  | G  | 455364 | 0.567 | -0.005 | 0.001 | 7.49E-05       | <0.001 | 142646 | 0.558 | 0.005  | 0.009 | 1.99E-06       | 0.5946 |
| rs773020                                                           | 9   | 77768122  | A  | G  | 455364 | 0.9   | 0.008  | 0.001 | 7.26E-05       | <0.001 | 142646 | 0.906 | -0.01  | 0.017 | 2.55E-06       | 0.5461 |

rs7770860 6 131186393 C T 455364 0.373 0.005 0.001 7.33E-05 <0.001 142646 0.38 0.018 0.009 2.59E-05 0.0546

**Table S16.** Univariable Mendelian Randomization Estimates using  $10^{-8}$  Significant Threshold for MDD in the Million Veterans Program on Loneliness

| Exposure | Outcome    | Method                    | SNPs (n) | $\beta$ | 95%CI         |
|----------|------------|---------------------------|----------|---------|---------------|
| MDD: MVP | Loneliness | Inverse Variance Weighted | 8        | 0.042   | 0.022, 0.063  |
|          |            | Weighted Median           | 8        | 0.038   | 0.014, 0.062  |
|          |            | Weighted Mode             | 8        | 0.025   | -0.014, 0.065 |
|          |            | RAPS                      | 8        | 0.045   | 0.027, 0.062  |
|          |            | MR-PRESSO                 | 8        | 0.064   | 0.055, 0.072  |

**Table S17.** Univariable Mendelian Randomization Sensitivity Analyses for Major Depressive Disorder using full Million Veteran's Program GWAS and Loneliness

| Exposure             | Outcome    | Method                    | SNPs (n) | $\beta$ | 95%CI        |
|----------------------|------------|---------------------------|----------|---------|--------------|
| MDD: MVP (Full GWAS) | Loneliness | Inverse Variance Weighted | 137      | 0.075   | 0.065, 0.085 |
|                      |            | Weighted Median           | 137      | 0.072   | 0.060, 0.083 |
|                      |            | Weighted Mode             | 137      | 0.079   | 0.036, 0.123 |
|                      |            | RAPS                      | 137      | 0.078   | 0.070, 0.086 |
|                      |            | MR-PRESSO                 | 137      | 0.075   | 0.072, 0.077 |

**Table S18.** F Statistic for Mendelian Randomization Sensitivity Analyses for MDD using full Million Veteran's Program GWAS data and Loneliness

| Exposure             | Outcome    | SNPs (n) | Mean F | Range F        |
|----------------------|------------|----------|--------|----------------|
| MDD: MVP (Full GWAS) | Loneliness | 137      | 43.26  | 29.52 - 127.69 |

**Table S19.** Cochran's heterogeneity statistic for Inverse Variance Weighted Mendelian Randomization Sensitivity analyses for MDD using full Million Veteran's Program GWAS data and Loneliness

| Exposure             | Outcome    | SNPs (n) | Q Statistic | p      |
|----------------------|------------|----------|-------------|--------|
| MDD: MVP (Full GWAS) | Loneliness | 137      | 218.75      | <0.001 |

**Table 20.**  $I^2_{GX}$  statistic for Sensitivity Analyses for MDD using full Million Veteran's Program GWAS data and Loneliness

| Exposure             | Outcome    | SNPs (n) | $I^2_{GX}$ |
|----------------------|------------|----------|------------|
| MDD: MVP (Full GWAS) | Loneliness | 137      | 0.318      |

**Table S21.** Outlier-corrected SNPs in MR-PRESSO Sensitivity Analyses for MDD using full Million Veteran's Program GWAS data and Loneliness

| Exposure             | Outcome    | SNP       | Outlier Test, p |
|----------------------|------------|-----------|-----------------|
| MDD: MVP (Full GWAS) | Loneliness | rs1054169 | <0.119          |
|                      |            | rs2214123 | <0.119          |

**Table S22.** Outlier-corrected SNPs in MR-PRESSO Sensitivity Analyses for MDD using full Million Veteran's Program GWAS data and Loneliness

| Exposure             | Outcome    | Global Test, <i>p</i> | Distortion Test, <i>p</i> |
|----------------------|------------|-----------------------|---------------------------|
| MDD: MVP (Full GWAS) | Loneliness | <0.001                | 0.983                     |

**Table S23.** Univariable Mendelian Randomization Sensitivity Analyses of Major Depressive Disorder without UKB sample using SNPs from full Million Veteran's Program GWAS and Loneliness

| Exposure                  | Outcome    | Method                    | SNPs (n) | $\beta$ | 95%CI        |
|---------------------------|------------|---------------------------|----------|---------|--------------|
| MDD: MVP (Full GWAS SNPs) | Loneliness | Inverse Variance Weighted | 92       | 0.056   | 0.047, 0.065 |
|                           |            | Weighted Median           | 92       | 0.051   | 0.039, 0.064 |
|                           |            | Weighted Mode             | 92       | 0.051   | 0.024, 0.078 |
|                           |            | RAPS                      | 92       | 0.061   | 0.052, 0.070 |
|                           |            | MR-PRESSO                 | 92       | 0.056   | 0.055, 0.056 |

**Table S24.** F Statistic for Mendelian Randomization Sensitivity Analyses of Major Depressive Disorder without UKB sample using SNPs from full Million Veteran's Program GWAS and Loneliness

| Exposure                  | Outcome    | SNPs (n) | Mean F | Range F      |
|---------------------------|------------|----------|--------|--------------|
| MDD: MVP (Full GWAS SNPs) | Loneliness | 92       | 13.35  | 1.21 - 36.82 |

**Table S25.** Cochran's heterogeneity statistic for Inverse Variance Weighted Mendelian Randomization Sensitivity analyses of Major Depressive Disorder without UKB sample using SNPs from full Million Veteran's Program GWAS and Loneliness

| Exposure                  | Outcome    | SNPs (n) | Q Statistic | <i>p</i> |
|---------------------------|------------|----------|-------------|----------|
| MDD: MVP (Full GWAS SNPs) | Loneliness | 92       | 117.64      | 0.031    |

**Table 26.**  $I^2_{GX}$  statistic for Sensitivity Analyses of Major Depressive Disorder without UKB sample using SNPs from full Million Veteran's Program GWAS and Loneliness

| Exposure                  | Outcome    | SNPs (n) | $I^2_{GX}$ |
|---------------------------|------------|----------|------------|
| MDD: MVP (Full GWAS SNPs) | Loneliness | 92       | 0.326      |

**Table S27.** Univariable Mendelian Randomization Sensitivity Analyses for MDD meta-analysis from Wray et al. and Loneliness

| Exposure          | Outcome    | Method                    | SNPs (n) | $\beta$ | 95%CI        |
|-------------------|------------|---------------------------|----------|---------|--------------|
| MDD (Wray et al.) | Loneliness | Inverse Variance Weighted | 35       | 0.049   | 0.037, 0.062 |
|                   |            | Weighted Median           | 35       | 0.038   | 0.024, 0.053 |
|                   |            | Weighted Mode             | 35       | 0.030   | 0.004, 0.055 |
|                   |            | RAPS                      | 35       | 0.052   | 0.042, 0.061 |
|                   |            | MR-PRESSO                 | 35       | 0.049   | 0.048, 0.05  |

**Table S28.** F Statistic for Mendelian Randomization Sensitivity Analyses for MDD meta-analysis from Wray et al. and Loneliness

| Exposure          | Outcome    | SNPs (n) | Mean F | Range F       |
|-------------------|------------|----------|--------|---------------|
| MDD (Wray et al.) | Loneliness | 35       | 37.79  | 25.09 - 66.76 |

**Table S29.** Cochran's heterogeneity statistic for Inverse Variance Weighted Mendelian Randomization Sensitivity analyses for MDD meta-analysis from Wray et al. and Loneliness

| Exposure          | Outcome    | SNPs (n) | Q Statistic | p     |
|-------------------|------------|----------|-------------|-------|
| MDD (Wray et al.) | Loneliness | 35       | 63.05       | 0.002 |

**Table S30.**  $I^2_{GX}$  statistic for Sensitivity Analyses for MDD meta-analysis from Wray et al. and Loneliness

| Exposure          | Outcome    | SNPs (n) | $I^2_{GX}$ |
|-------------------|------------|----------|------------|
| MDD (Wray et al.) | Loneliness | 35       | 0.0        |

**Table S31.** Univariable Mendelian Randomization Sensitivity Analyses for Loneliness and Major Depressive Disorder using the PHQ-2 GWAS

| Exposure   | Outcome     | Method                    | SNPs (n) | $\beta$ | 95%CI        |
|------------|-------------|---------------------------|----------|---------|--------------|
| Loneliness | MDD (PHQ-2) | Inverse Variance Weighted | 14       | 0.700   | 0.417, 0.984 |
|            |             | Weighted Median           | 14       | 0.450   | 0.17, 0.748  |
|            |             | Weighted Mode             | 14       | 0.374   | -0.14, 0.889 |
|            |             | RAPS                      | 14       | 0.743   | 0.551, 0.936 |
|            |             | MR-PRESSO                 | 14       | 0.617   | 0.551, 0.683 |

**Table S32.** F Statistic for Mendelian Randomization Sensitivity Analyses for Loneliness and Major Depressive Disorder using the PHQ-2 GWAS

| Exposure   | Outcome     | SNPs (n) | Mean F | Range F     |
|------------|-------------|----------|--------|-------------|
| Loneliness | MDD (PHQ-2) | 14       | 35.72  | 29.81 56.41 |

**Table S33.** Cochran's heterogeneity statistic for Inverse Variance Weighted Mendelian Randomization Sensitivity analyses for Loneliness and Major Depressive Disorder using the PHQ-2 GWAS

| Exposure   | Outcome     | SNPs (n) | Q Statistic | p     |
|------------|-------------|----------|-------------|-------|
| Loneliness | MDD (PHQ-2) | 14       | 32.82       | 0.002 |

**Table S34.**  $I^2_{GX}$  statistic for Sensitivity Analyses for Loneliness and Major Depressive Disorder using the PHQ-2 GWAS

| Exposure   | Outcome     | SNPs (n) | $I^2_{GX}$ |
|------------|-------------|----------|------------|
| Loneliness | MDD (PHQ-2) | 14       | 0.0        |
